# Supplementary material
Source: HighWire-hosted journal article supplement (https://erj.ersjournals.com/content/57/5/2004588)
Supplement: inline-supplementary-material-1 [file inline-supplementary-material-1.pdf]

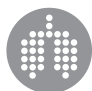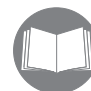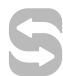

SHAREABLE PDF

# Salvaging the endothelium in acute respiratory distress syndrome: a druggable intersection between TLR4 and NAD<sup>+</sup> signalling

Ji Young Lee<sup>1,2,3</sup>, Reece P. Stevens<sup>1,3</sup>, Marie Migaud<sup>4,5</sup> and Troy Stevens <sup>1,2,3</sup>

**Affiliations:** <sup>1</sup>Dept of Physiology and Cell Biology, University of South Alabama, Mobile, AL, USA. <sup>2</sup>Dept of Internal Medicine, University of South Alabama, Mobile, AL, USA. <sup>3</sup>The Center for Lung Biology, University of South Alabama, Mobile, AL, USA. <sup>4</sup>Dept of Pharmacology, University of South Alabama, Mobile, AL, USA. <sup>5</sup>The Mitchell Cancer Institute, the University of South Alabama, Mobile, AL, USA.

**Correspondence:** Troy Stevens, Dept of Physiology and Cell Biology, Center for Lung Biology, College of Medicine, University of South Alabama, 5795 USA Drive North, Mobile, AL 36688-0002, USA. E-mail: [tstevens@southalabama.edu](mailto:tstevens@southalabama.edu)

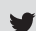

@ERSpublications

eNAMPT neutralisation may be effective treatment in acute respiratory distress syndrome

<https://bit.ly/3oaES9c>

**Cite this article as:** Lee JY, Stevens RP, Migaud M, *et al.* Salvaging the endothelium in acute respiratory distress syndrome: a druggable intersection between TLR4 and NAD<sup>+</sup> signalling. *Eur Respir J* 2021; 57: 2004588 [<https://doi.org/10.1183/13993003.04588-2020>].

This single-page version can be shared freely online.

The acute respiratory distress syndrome (ARDS) remains an intractable problem for intensivists, even with advancements in critical care and mechanical ventilation. Mortality rates in ARDS patients are around 35–45% [1]. However, these mortality numbers represent a conservative estimate of the ARDS healthcare impact, because survivors exhibit staggering rates of morbidity and mortality in the aftermath of their intensive care unit (ICU) stay, including neurocognitive dysfunction that can prohibit the return to activities of daily living [2, 3]. Development of medical therapies that improve both the short- and long-term outcomes of these critically ill patients remain an urgent unmet need.
